# Supplementary material for: CARARIME: Interactive web server for comprehensive analysis of renal allograft rejection in immune microenvironment
Source: Front Immunol. 2022 Nov 17;13:1026280. doi: 10.3389/fimmu.2022.1026280 (PMC9714541; doi:10.3389/fimmu.2022.1026280)
Supplement: Supplementary Table 1 — The details of the clinical cohorts used in this study. [file Table_1.xlsx]

## Sheet: Sheet1
Dataset Name	Sample Number	Organism	Sample Types	Experiment type	Platforms	Citation(s)	Summary	Overall design
GSE124203	1745	Homo sapiens	Kidney	Expression profiling by array	GPL13667	Reeve J, Böhmig GA, Eskandary F, Einecke G et al. Generating automated kidney transplant biopsy reports combining molecular measurements with ensembles of machine learning classifiers. Am J Transplant 2019 Oct;19(10):2719-2731. PMID: 30868758	We previously reported a system for assessing rejection in kidney transplant biopsiesusing microarray-based gene expression data, the Molecular Microscope® Diagnostic System (MMDx). Ensembles generated diagnoses that were both more accurate than the best individual classifiers, and nearly as stable as the best,consistent with expectations from the machine learning literature. Human experts had ~9…	The present study was designed to optimize the accuracy and stability of MMDx diagnoses by replacing single machine learning classifiers with ensembles of diverse classifier methods. We also examined the use of automated report sign-outs and the agreement between multiple human interpreters of the molecular results.
GSE98320	1208	Homo sapiens	Kidney	Expression profiling by array	GPL15207	Reeve J, Böhmig GA, Eskandary F, Einecke G et al. Assessing rejection-related disease in kidney transplant biopsies based on archetypal analysis of molecular phenotypes. JCI Insight 2017 Jun 15;2(12). PMID: 28614805	Molecular phenotyping of biopsies affords opportunities for increased precision and improved disease classification to address the limitations of conventional histologic diagnostic systems. We applied archetypal analysis, an unsupervised method similar to cluster analysis, to microarray data from 1208 prospectively collected kidney transplant biopsies from 13 centers. Seven machine learning-gener…	We applied archetypal analysis, an unsupervised method similar to cluster analysis, to microarray data from 1208 prospectively collected kidney transplant biopsies from 13 centers.
GSE107503	530	Homo sapiens	Blood	Expression profiling by array	GPL13158	Friedewald JJ, Kurian SM, Heilman RL, Whisenant TC et al. Development and clinical validity of a novel blood-based molecular biomarker for subclinical acute rejection following kidney transplant. Am J Transplant 2019 Jan;19(1):98-109. PMID: 29985559	Sub-clinical acute rejection (subAR) in kidney transplant recipients (KTR) leads to chronic rejection and graft loss. Non-invasive biomarkers are needed to detect subAR. 307 KTR were enrolled into a multi-center observational study. Precise clinical phenotypes (CP) were used to define subAR. Differential gene expression (DGE) data from peripheral blood samples paired with surveillance biopsies we…	307 KTR were enrolled into a multi-center observational study. Precise clinical phenotypes (CP) were used to define subAR. Differential gene expression (DGE) data from peripheral blood samples paired with surveillance biopsies were used to train a Random Forests (RF) model to develop a gene expression profile (GEP) for subAR. A separate cohort of paired samples was used to validate the GEP. Clini…
GSE36059	381	Homo sapiens	Kidney	Expression profiling by array	GPL570	Reeve J, Sellarés J, Mengel M, Sis B et al. Molecular diagnosis of T cell-mediated rejection in human kidney transplant biopsies. Am J Transplant 2013 Mar;13(3):645-55. PMID: 23356949	Histologic diagnosis of T cell-mediated rejection in kidney transplant biopsies has limited reproducibility because it is based on non-specific lesions using arbitrary rules that are subject to differing interpretations. We used microarray results from 403 indication biopsies previously given histologic diagnoses to develop a molecular classifier that assigned a molecular T cell-mediated rejectio…	All consenting renal transplant patients undergoing biopsies for cause as standard of care. 403 samples and 8 controls (nephrectomies).
GSE48581	294	Homo sapiens	Kidney	Expression profiling by array	GPL570	Halloran PF, Pereira AB, Chang J, Matas A et al. Potential impact of microarray diagnosis of T cell-mediated rejection in kidney transplants: The INTERCOM study. Am J Transplant 2013 Sep;13(9):2352-63. PMID: 23915426	The authors report that in INTERCOM, a prospective international study of 300 kidneytransplant biopsies, a microarray-based molecular score for T cell-mediated rejection changed the assessment of 26% of all biopsies, illustrating the potential of precision diagnostics to impact practice.	Microarray analysis of 300 kidney transplant biopsies (non-TCMR, TCMR) and 6 nephrectomies.
GSE21374	282	Homo sapiens	Kidney	Expression profiling by array	GPL570	Einecke G, Reeve J, Sis B, Mengel M et al. A molecular classifier for predicting future graft loss in late kidney transplant biopsies. J Clin Invest 2010 Jun;120(6):1862-72. PMID: 20501945	Kidney transplants that develop dysfunction or proteinuria after one year post transplant are at considerable risk for progression to renal failure. Identifying the molecules associated with graft failure could potentially lead to interventions that would slow the progression of organ failure. We analyzed the relationship between gene expression in late biopsies for cause in human kidney transpla…	All consenting renal transplant patients undergoing biopsies for cause as standard of care between 09/2004 and 10/2007 at the university of Alberta or between 11/2006 and 02/2007 at the University of Illinois were included in the analysis. In addition, biopsies obtained from Minnesota between 09/2006 and 09/2007 were used as an independent . In addition to the cores required for standard histopat…
GSE112927	235	Homo sapiens	Blood	Expression profiling by high throughput sequencing	GPL20301	Zhang W, Yi Z, Wei C, Keung KL et al. Pretransplant transcriptomic signature in peripheral blood predicts early acute rejection. JCI Insight 2019 Jun 6;4(11). PMID: 31167967	Early development of acute rejection after kidney transplantation is associated withdiminished long-term graft survival. Predicting early acute rejection (EAR)at the time of transplant is important to risk-stratify patients and titrate immunosuppression accordingly. We performed whole-blood RNA sequencing at the time of transplant in 235 kidney transplant recipients enrolled in a prospective-coho…	The transcriptomic profiles of discovery set (N=81) was used for identification of gene signatures associated with early acute rejection. The early acute rejection prediction with the gene signatures was validated on validation set V1 (N=74) and late acute rejection and graft loss was validated on combined datasets of V1 (N=74) and V2 (N=80).
GSE129166	212	Homo sapiens	Kidney+Blood	Expression profiling by array	GPL570	Van Loon E, Gazut S, Yazdani S, Lerut E et al. Development and validation of a peripheral blood mRNA assay for the assessment of antibody-mediated kidney allograft rejection: A multicentre, prospective study. EBioMedicine 2019 Aug;46:463-472. PMID: 31378695	Microarrays were used to analyze the gene expression in peripheral blood and kidney allograft biopsies from patients with a kidney transplantation to get more insight in the molecular mechanisms underlying the different clinical phenotypesof kidney transplant rejection.	117 peripheral blood samples and 95 kidney allograft biopsies were used for genome-wide gene expression analysis. The updated Banff 2017 classification was used for diagnosis of the samples. Total RNA extracted from blood and biopsies was used to analyze mRNA expression via Affymetrix Human U133 Plus 2.0 arrays.
GSE107506	129	Homo sapiens	Blood	Expression profiling by array	GPL13158	Friedewald JJ, Kurian SM, Heilman RL, Whisenant TC et al. Development and clinical validity of a novel blood-based molecular biomarker for subclinical acute rejection following kidney transplant. Am J Transplant 2019 Jan;19(1):98-109. PMID: 29985559	Sub-clinical acute rejection (subAR) in kidney transplant recipients (KTR) leads to chronic rejection and graft loss. Non-invasive biomarkers are needed to detect subAR. 307 KTR were enrolled into a multi-center observational study. Precise clinical phenotypes (CP) were used to define subAR. Differential gene expression(DGE) data from peripheral blood samples paired with surveillance biopsies wer…	307 KTR were enrolled into a multi-center observational study. Precise clinical phenotypes (CP) were used to define subAR. Differential gene expression (DGE) data from peripheral blood samples paired with surveillance biopsies were used to train a Random Forests (RF) model to develop a gene expression profile (GEP) for subAR. A separate cohort of paired samples was used to validate the GEP. Clini…
GSE25902	120	Homo sapiens	Kidney	Expression profiling by array	GPL570	Naesens M, Khatri P, Li L, Sigdel TK et al. Progressive histological damage in renal allografts is associated with expression of innate and adaptive immunity genes. Kidney Int 2011 Dec;80(12):1364-76. PMID: 21881554	Slowly progressive chronic tubulo-interstitial damage jeopardizes long-term renal allograft survival. Both immune and non-immune mechanisms are thought to contribute, but the most promising targets for timely intervention have not been identified. OBJECTIVE In the current study we seek to determine the driving force behind progressive histological damage of renal allografts, without the interfere…	We used microarrays to examine whole genome expression profiles in renal allograft protocol biopsies, and analyzed the correlation between gene expression and the histological appearance over time. The gene expression profiles in these protocol biopsies were then compared with gene expression of biopsies with acute T-cell mediated rejection. Human renal allograft biopsies (N=120) were included: 9…
GSE50084	115	Homo sapiens	Kidney	Expression profiling by array	GPL6244	Ó Broin P, Hayde N, Bao Y, Ye B et al. A pathogenesis-based transcript signature in donor-specific antibody-positive kidney transplant patients with normal biopsies. Genom Data 2014 Dec;2:357-60. PMID: 26484130	The presence of Donor-Specific anti-HLA Antibodies (DSA) is associated with an increased risk of both acute and chronic antibody-mediated rejection (AMR) in kidney allografts. AMR has remained challenging in kidney transplantation and is the major cause of late allograft loss. However, not all patients with DSA develop AMR, leading to the question of whether this represents accommodation, if othe…	All clinically indicated kidney transplant biopsies performed at our institution after January 2009 were reviewed and 263 patients with anti-HLA antibody testing at the time of biopsy were identified. There were 71 DSA+ and 192 DSA- patients (Figure 1). Of the 71 DSA+ patients, 46 had biopsy diagnosis of acute AMR (n=9) or chronic AMR (n=37), and 25 had normal histopathology or minimal non-specif…
GSE39299	110	Homo sapiens	Blood	Expression profiling by array	GPL8136	Viklicky O, Hruba P, Tomiuk S, Schmitz S et al. Sequential Targeting of CD52 and TNF Allows Early Minimization Therapy in Kidney Transplantation: From a Biomarker to Targeting in a Proof-Of-Concept Trial. PLoS One 2017;12(1):e0169624. PMID: 28085915	The efficacy and safety of tacrolimus or sirolimus monotherapy after combined induction therapy with campath-1H and infliximab monoclonal antibodies in 20 kidney graft recipients were evaluated in single centre prospective randomized trial. Campath-1H and infliximab induction followed by tacrolimus monotherapy spare tolerance asssociated naive B-cell related molecular markers and results in 36 mo…	The experiments were performed with total RNA derived from whole blood samples of twenty different patients who had undergone a kidney transplantation. After an initial administration of Campath, Infliximab, Methylprednisolone, and Tacrolimus, the participants of the trial were split into two arms, one of which was treated with the immunosuppressive Calcineurin inhibitor Tacrolimus, and the other…
GSE50058	101	Homo sapiens	Kidney	Expression profiling by array	GPL570	Khatri P, Roedder S, Kimura N, De Vusser K et al. A common rejection module (CRM) for acute rejection across multiple organs identifies novel therapeutics for organ transplantation. J Exp Med 2013 Oct 21;210(11):2205-21. PMID: 24127489	Using meta-analysis of eight independent transplant datasets (236 graft biopsy samples) from four organs, we identified a common rejection module (CRM) consisting of 11 genes that were significantly overexpressed in acute rejection (AR) across all transplanted organs. The CRM genes could diagnose AR with high specificity and sensitivity in three additional independent cohorts (794 samples). In an…	The 101 samples in this study were used as case-control experiment between acute rejection (AR) and stable (STA) in renal transplant. The samples in this series are one of the three independent validation cohorts. The other two cohorts are described in GSE21374 and GSE36059
GSE72925	94	Homo sapiens	Kidney	Expression profiling by array	GPL570	Sigdel TK, Bestard O, Salomonis N, Hsieh SC et al. Intragraft Antiviral-Specific Gene Expression as a Distinctive Transcriptional Signature for Studies in Polyomavirus-Associated Nephropathy. Transplantation 2016 Oct;100(10):2062-70. PMID: 27140517	Polyoma virus nephropathy (PVAN) is a common cause of kidney allograft dysfunction and loss. Microscopic descriptions of PVAN are very similar to T-cell mediated rejection (TCMR) and have unclear underlying molecular mechanisms. To identify PVAN-specific gene expression, we analyzed 162 kidney biopsies with and without PVAN for global gene expression. Unsupervised hierarchical clustering analysis…	A total of 168 kidney biopsies from kidney transplant patients were used. The kidney biopsies included renal biopsies from PVAN (n=10), T cell mediated cellular rejection (n=26), patients with IFTA (n=59), patients with stable grafts (STA) (n=73).
GSE120396	88	Homo sapiens	Blood	Expression profiling by high throughput sequencing	GPL11154	Zhang W, Yi Z, Keung KL, Shang H et al. A Peripheral Blood Gene Expression Signature to Diagnose Subclinical Acute Rejection. J Am Soc Nephrol 2019 Aug;30(8):1481-1494. PMID: 31278196	Histological features of acute rejection can be detected in surveillance biopsies despite stable graft function and can negatively impact graft outcomes. However, routine surveillance biopsies for detection of subclinical rejection are not generally performed due to potential risks and costs associated with repeated biopsies. Noninvasive biomarkers are required to facilitate early detection of ac…	The transcriptomic profiles of discovery set (N=88) was used for identification of gene signatures associated with subclinical acute rejection.
GSE9493	82	Homo sapiens	Kidney	Expression profiling by array	GPL570	Saint-Mezard P, Berthier CC, Zhang H, Hertig A et al. Analysis of independent microarray datasets of renal biopsies identifies a robust transcript signature of acute allograft rejection. Transpl Int 2009 Mar;22(3):293-302. PMID: 19017305	Specific early diagnosis of renal allograft rejection is gaining importance in the current trend to minimize and individualize immunosuppression. Gene expression analyses could contribute significantly by defining “molecular Banff” signatures. Several previous studies have applied transcriptomics to distinguish different classes of kidney biopsies. However, the heterogeneity of microarray platfor…	renal allograft core biopsies for clinical indications with different histopathological diagnoses according to BANFF'97 criteria
GSE15296	75	Homo sapiens	Blood	Expression profiling by array	GPL570	Kurian SM, Williams AN, Gelbart T, Campbell D et al. Molecular classifiers for acute kidney transplant rejection in peripheral blood by whole genome gene expression profiling. Am J Transplant 2014 May;14(5):1164-72. PMID: 24725967	In the present work, we have used whole genome expression profiling of peripheral blood samples from 51 patients with biopsy-proven acute kidney transplant rejection and 24 patients with excellent function and biopsy-proven normal transplant histology. The results demonstrate that there are 1738 probesets on the Affymetrix HG-U133 Plus 2.0 GeneChip representing 1472 unique genes which are differe…	Microarray profiles of peripheral blood from 51 biopsy-proven acute kidney rejection (AR) and 24 well-functioning kidney transplants were randomized and compared using class comparisons, network and biological function analyses.
GSE120397	65	Homo sapiens	Blood	Expression profiling by array	GPL5175	Zhang W, Yi Z, Keung KL, Shang H et al. A Peripheral Blood Gene Expression Signature to Diagnose Subclinical Acute Rejection. J Am Soc Nephrol 2019 Aug;30(8):1481-1494. PMID: 31278196	Histological features of acute rejection can be detected in surveillance biopsies despite stable graft function and can negatively impact graft outcomes. However, routine surveillance biopsies for detection of subclinical rejection are not generally performed due to potential risks and costs associated with repeated biopsies. Noninvasive biomarkers are required to facilitate early detection of ac…	A microarray set (N=65) was used for validation of gene signatures associated with subclinical acute rejection.
GSE138043	52	Homo sapiens	Kidney	Expression profiling by array	GPL5175	Yi Z, Keung KL, Li L, Hu M et al. Key driver genes as potential therapeutic targets in renal allograft rejection. JCI Insight 2020 Aug 6;5(15). PMID: 32634125	Acute rejection (AR) in renal transplantation is an established risk factor for reduced allograft survival, and still occurs in 10-20% of allograft recipients despite standard of care immunosuppression. This suggests molecular pathways exist which are inadequately suppressed by current therapy. We describe for the first time, integrative network- based computational strategies incorporating genot…	A microarray set (N=52) was used for discovery of meta-gene sigantures associated with acute rejection.
GSE46474	40	Homo sapiens	Blood	Expression profiling by array	GPL570	Günther OP, Shin H, Ng RT, McMaster WR et al. Novel multivariate methods for integration of genomics and proteomics data: applications in a kidney transplant rejection study. OMICS 2014 Nov;18(11):682-95. PMID: 25387159	Acute renal allograft rejection is an important complication in kidney transplantation. Accurate diagnosis of rejection events is necessary for timely response and treatment. We illustrate the usefulness and biological relevance of selected multivariate approaches to detect rejection from genomic and proteomic signals. The data was used to study gene expression changes using whole genome microarr…	Not Available
GSE47097	40	Homo sapiens	Kidney	Expression profiling by array	GPL6883	Rekers NV, Bajema IM, Mallat MJ, Anholts JD et al. Increased metallothionein expression reflects steroid resistance in renal allograft recipients. Am J Transplant 2013 Aug;13(8):2106-18. PMID: 23763497	Steroid-refractory acute rejection is a risk factor for inferior renal allograft outcome. We aimed to gain insight into the mechanisms underlying steroid resistance by identifying novel molecular markers of steroid-refractory acute rejection. Eighty-three kidney transplant recipients (1995-2005), who were treated with methylprednisolone during a first acute rejection episode, were included in thi…	Transcriptional profiles of 40 renal allograft biopsy samples were analyzed using Illumina HumanRef-8 v3.0 BeadChips (Illumina, San Diego, CA). Expression profiles were investigated in total RNA isolated from biopsy samples of 18 patients with steroid responsive acute rejection and 18 patients with steroid resistant acute rejection. Four biopsies, taken during acute decrease of graft function but…
GSE131179	34	Homo sapiens	Kidney	Expression profiling by high throughput sequencing	GPL16791	Mueller FB, Yang H, Lubetzky M, Verma A et al. Landscape of innate immune system transcriptome and acute T cell-mediated rejection of human kidney allografts. JCI Insight 2019 Jul 11;4(13). PMID: 31292297	Acute rejection of human allografts has been viewed mostly through the lens of adaptive immunity, and the intragraft landscape of innate immunity genes has not been characterized in an unbiased fashion. We did RNA sequencing of 34 kidney allograft biopsy specimens from 34 adult recipients; 16 were categorized as Banff acute T-cell mediated rejection (TCMR) and 18 as normal. Computational analysis…	We studied 34 adult kidney transplant recipients, a subset of kidney allograft recipients transplanted and followed at our center. Biopsies were done under ultrasound guidance and were read and reported independently by two renal pathologists at our center (S.S and S.V.S), based on the Banff 2017 update of the Banff ‘97 classification of allograft pathology (64, 65). Biopsy tissue sections were s…
GSE1563	32	Homo sapiens	Kidney+Blood	Expression profiling by array	GPL8300	Flechner SM, Kurian SM, Head SR, Sharp SM et al. Kidney transplant rejection and tissue injury by gene profiling of biopsies and peripheral blood lymphocytes. Am J Transplant 2004 Sep;4(9):1475-89. PMID: 15307835	We used DNA microarrays (HG-U95Av2 GeneChips) to determine gene expression profiles for kidney biopsies and peripheral blood lymphocytes (PBLs) in transplant patients. Sample classes include kidney biopsies and PBLs from patients with 1) healthy normal donor kidneys, 2) well-functioning transplants with no clinical evidence of rejection, 3) kidneys undergoing acute rejection, and 4) transplants w…	Not Available
GSE53605	31	Homo sapiens	Kidney	Expression profiling by array	GPL571	Maluf DG, Dumur CI, Suh JL, Lee JK et al. Evaluation of molecular profiles in calcineurin inhibitor toxicity post-kidney transplant: input to chronic allograft dysfunction. Am J Transplant 2014 May;14(5):1152-1163. PMID: 24698514	The molecular basis of calcineurin inhibitor toxicity (CNIT) in kidney transplantation (KT) and its contribution to chronic allograft dysfunction (CAD) with interstitial fibrosis (IF) and tubular atrophy (TA) were evaluated. Molecular signatures characterizing CNIT samples were identified. The recognized CNIT gene signature was most common in patients with decreased graft function and histologica…	To test CNIT contribution to CAD progression, kidney biopsies from transplant recipients with histological diagnosis of CNIT (n=14), acute rejection (ACR, n=13), and CAD with IF/TA (n=10), including 18 Normal allografts, were analyzed using gene expression microarrays.
GSE20300	24	Homo sapiens	Blood	Expression profiling by array	GPL570	Shen-Orr SS, Tibshirani R, Khatri P, Bodian DL et al. Cell type-specific gene expression differences in complex tissues. Nat Methods 2010 Apr;7(4):287-9. PMID: 20208531	Tissues are often made up of multiple cell-types. Blood, for example, contains many different cell-types, each with its own functional attributes and molecular signature. In humans, because of its accessibility and immune functionality, blood cells have been used as a source for RNA-based biomarkers for many diseases. Yet, the proportions of any given cell-type in the blood can vary markedly, eve…	Whole blood gene expression measurements for 24 pediatric renal transplant patients were analyzed on human specific HGU133V2.0 (+) whole genome expression arrays. Blood drawn using PaxGene Blood RNA Tubes (PreAnalytiX, Qiagen).
GSE51675	18	Homo sapiens	Blood	Expression profiling by array	GPL6480	Rascio F, Pontrelli P, Accetturo M, Oranger A et al. A type I interferon signature characterizes chronic antibody-mediated rejection in kidney transplantation. J Pathol 2015 Sep;237(1):72-84. PMID: 25925804	Chronic antibody-mediated rejection (CAMR) represents the main cause of kidney graft loss, but its pathogenesis is unclear. In order to uncover the molecular mechanisms underlying this condition, we characterized the molecular signature of circulating peripheral blood mononuclear cells and, separately, of CD4+ T lymphocytes isolated from CAMR patients compared to kidney transplant recipients with…	For microarray analysis, we studied 8 patients included into the control-group and 10 included into the study group. The control group was represented by renal transplant recipients undergoing protocol graft biopsies, with normal renal function and histology, in the absence of circulating anti-HLA antibodies. Study group patients showed clinical and histological evidence of CAMR according to Banf…
GSE120649	16	Homo sapiens	Blood	Expression profiling by high throughput sequencing	GPL16791	Matz M, Heinrich F, Zhang Q, Lorkowski C et al. The regulation of interferon type I pathway-related genes RSAD2 and ETV7 specifically indicates antibody-mediated rejection after kidney transplantation. Clin Transplant 2018 Dec;32(12):e13429. PMID: 30341925	We performed total RNA-Seq and compared expression levels of genes of whole blood cells isolated from patients after kidney transplantation with stable graft function, antibody mediated- and t cell mediated graft rejection.	Whole blood cells were isolated from 6 patients with stable graft function, 6 patients with histologically verified antibody mediated graft rejection episode and 4 patients with histologically verified T cell mediated graft rejection after kidney transplantation. Total RNA was extracted and cDNA libraries for total RNA sequencing were generated using “TruSeq® Stranded Total RNA Library” kit (Illu…
GSE17068	15	Homo sapiens	Blood	Expression profiling by array	GPL6480	Not Available	Immune tolerance and persistent mixed chimerism can be achieved reproducibly after combined organ and hematopoietic cell transplantation in mice conditioned with total lymphoid irradiation plus anti-thymocyte globulin. We studied the safety and reproducibility of this approach in a cohort of kidney transplant patients, and tried to identify immune monitoring procedures that can predict tolerance …	45 Agilent Microarray samples were conducted, including 16 tolerance patients, 10 chronic rejection patients, 5 healthy normal controls, and 7 paired pre and post-transplant induced tolerance patients. The aim is to see whether induced tolerance patients show operational tolerance gene expression signature and can withdraw or minimize the immunosuppression regimens.
GSE64261	10	Homo sapiens	Blood	Expression profiling by array	GPL6480	Rascio F, Pontrelli P, Accetturo M, Oranger A et al. A type I interferon signature characterizes chronic antibody-mediated rejection in kidney transplantation. J Pathol 2015 Sep;237(1):72-84. PMID: 25925804	Chronic antibody-mediated rejection (CAMR) represents the main cause of kidney graft loss, but its pathogenesis is unclear. In order to uncover the molecular mechanisms underlying this condition, we characterized the molecular signature of circulating peripheral blood mononuclear cells and, separately, of CD4+ T lymphocytes isolated from CAMR patients compared to kidney transplant recipients with…	We performed microarray experiments in CD4+ T cells isolated from a small independent group of 5 patients included into the control-group and 5 included into the study group. The control group was represented by renal transplant recipients undergoing protocol graft biopsies, with normal renal function and histology, in the absence of circulating anti-HLA antibodies. Study group patients showed cl…
